# Supplementary material
Source: publisher figshare collection journal article supplement (https://karger.figshare.com/ndownloader/files/25444661)
Supplement: Supplementary file 1 [file 25444661]

| **Supplementary Table:** Antibodies used for immunohistochemistry studies | | | |
| --- | --- | --- | --- |
| **Antibody specificity** | **Clone** | **Dilution** | **Source** |
| **Synaptophysin** | SNP88 | 1:2000 | Biogenex |
| **Chromogranin** | LK2H10 | RTU | Ventana |
| **TTF-1** | 8G7G3/1 | RTU | Ventana |
| **Thyroglobulin** | 2H11+6E1 | RTU | Cell Marque |
| **Calcitonin** | Polyclonal | RTU | Cell Marque |
| **PAX8** | Polyclonal | 1:100 | Proteintech |
| **mCEA** | TF 3H8-1 | RTU | Ventana |
|  |  |  |  |
| RTU, ready to use |  |  |  |
